# Supplementary material for: The relationship between mitochondrial DNA haplotype and its copy number on body weight and morphological traits of Wuliangshan black-bone chickens
Source: PeerJ. 2024 Dec 16;12:e17989. doi: 10.7717/peerj.17989 (PMC11657187; doi:10.7717/peerj.17989)
Supplement: Supplemental Information 1 [file peerj-12-17989-s001.xlsx]

## Sheet: Sheet1
Haplotype no.	N(Number of individuals 0	mtDNA copies x̄ ± SE	Body weight/kg x̄ ± SE	tibial length/mm x̄ ± SE	tibial circumference/mm x̄ ± SE	body oblique length/mm x̄ ± SE	chest width/mm x̄ ± SE	chest depth/mm x̄ ± SE
3	37	82.44 ± 13.57	1.97 ± 0.06	98.14 ± 1.14	39.87 ± 0.70	205.56 ± 1.46	70.03 ± 1.11	101.78 ± 1.30
4	35	74.08 ± 7.64	2.05 ± 0.06	99.18 ± 0.87	41.47 ± 0.62	204.41 ± 1.13	71.48 ± 1.13	97.31 ± 1.62
5	6	102.68 ± 22.36	2.28 ± 0.09	100.37 ± 3.42	40.83 ± 1.53	203.33 ± 2.10	73.82 ± 3.00	103.25 ± 2.48
6	10	52.81 ± 5.81	2.31 ± 0.09	97.99 ± 1.91	40.00 ± 1.88	208.75 ± 2.26	71.11 ± 2.11	101.40 ± 2.28
7	28	70.03 ± 6.92	2.20 ± 0.07	101.71 ± 1.43	42.08 ± 0.79	206.67 ± 1.43	74.21 ± 1.59	100.88 ± 1.42
8	7	88.27 ± 33.31	2.03 ± 0.09	100.57 ± 1.57	41.43 ± 1.42	204.29 ± 2.97	67.71 ± 2.03	100.86 ± 2.04
9	6	47.64 ± 5.37	2.18 ± 0.11	99.83 ± 2.56	42.50 ± 1.11	205.00 ± 3.41	71.67 ± 3.77	101.33 ± 2.53
11	13	62.73 ± 15.28	1.88 ± 0.11	96.40 ± 2.53	39.00 ± 1.00	204.00 ± 2.21	68.70 ± 2.60	101.20 ± 2.40
12	9	71.86 ± 11.43	2.10 ± 0.16	97.56 ± 1.00	41.67 ± 0.83	203.33 ± 2.35	72.44 ± 3.83	95.00 ± 4.024
17	5	85.36 ± 33.71	2.16 ± 0.15	89.75 ± 3.42	40.00 ± 2.04	205.00 ± 2.88	74.25±4.25	106.25 ± 3.72
