# Supplementary material for: The relationship between mitochondrial DNA haplotype and its copy number on body weight and morphological traits of Wuliangshan black-bone chickens
Source: PeerJ. 2024 Dec 16;12:e17989. doi: 10.7717/peerj.17989 (PMC11657187; doi:10.7717/peerj.17989)
Supplement: Supplemental Information 2 [file peerj-12-17989-s002.xlsx]

## Sheet: Sheet1
Haplotypes	ID	mean gene located in mtDNA(ND2)	mean single-copy gene( VIM)	CTn-CTmt	mtDNA copies
4	2221	24.1037	29.2768	5.17308	36.0788
4	2064	24.4266	29.7734	5.34677	40.6947
4	2273	23.6251	28.4271	4.80204	27.897
4	2003	23.043	30.2945	7.25151	152.378
4	1951	22.4697	29.3285	6.85878	116.064
4	1851	22.4625	28.2387	5.77617	54.8026
4	1867	23.6563	28.6531	4.99681	31.9293
4	1793	22.3423	28.6052	6.26287	76.7914
4	1707	22.6377	28.3814	5.74368	53.5821
4	1634	21.7684	27.6318	5.86347	58.2209
4	1583	22.6468	28.2272	5.58035	47.8466
4	1539	23.5077	28.4112	4.90341	29.9278
4	1345	23.3316	29.4773	6.1457	70.8009
4	1324	22.294	28.5033	6.20928	73.9909
4	1082	21.8707	28.3123	6.44158	86.9179
4	208	24.6392	30.0505	5.41129	42.5559
4	213	23.7835	30.0142	6.23067	75.0962
4	228	23.4733	30.039	6.56566	94.7241
4	231	24.4069	29.187	4.7801	27.4761
4	250	24.0011	30.008	6.00694	64.3088
4	259	23.532	29.2239	5.69192	51.6937
4	262	23.8884	29.6584	5.76998	54.5679
4	325	22.8649	28.5578	5.69295	51.7306
4	398	23.0003	28.3515	5.35122	40.8206
4	534	23.2091	30.6342	7.42512	171.864
4	560	24.1406	29.2452	5.10457	34.4056
4	658	22.8216	29.185	6.36336	82.331
4	990	22.9726	29.2779	6.30537	79.0872
4	996	23.5713	29.9999	6.42862	86.1403
4	1052	21.0181	28.3849	7.36678	165.052
4	1080	22.6103	30.1205	7.51018	182.302
4	40	23.0153	28.6059	5.59062	48.1885
4	28	22.0633	27.7727	5.70937	52.3229
4	52	23.7482	29.305	5.55683	47.0731
4	8	21.3645	28.8806	7.51602	183.04
3	2105	21.8733	28.1099	6.23658	75.4047
3	2058	22.898	28.7737	5.87568	58.7158
3	2041	23.4418	29.6472	6.20538	73.7912
3	2243	23.6372	28.868	5.23086	37.553
3	2251	23.4939	29.3062	5.81232	56.1929
3	2241	22.6073	28.1499	5.5426	46.611
3	2285	23.7132	28.6101	4.89686	29.7921
3	2279	22.2297	28.0956	5.86597	58.322
3	2237	22.3139	27.5054	5.19153	36.5431
3	2236	22.7864	28.5931	5.80675	55.9764
3	1947	21.4789	27.964	6.48508	89.5782
3	1948	22.6327	27.8842	5.25142	38.0921
3	1805	22.97	29.24	6.27	77.1717
3	1849	22.52	27.67	5.15	35.5062
3	1790	22.37	27.45	5.08	33.8246
3	1665	23.7345	32.6071	8.87252	468.701
3	1587	22.57	28.5	5.93	60.9688
3	1516	22.85	28.99	6.14	70.5219
3	1380	22.86	29.66	6.8	111.43
3	1270	22.65	29.45	6.8	111.43
3	1076	22.28	28.44	6.16	71.5064
3	1059	22.83	29.14	6.31	79.3413
3	1012	22.2148	28.9977	6.78283	110.112
3	970	21.1249	29.432	8.30717	316.742
3	939	23.18	27.24	4.06	16.6795
3	943	22.5814	29.0844	6.50299	90.6977
3	998	22.15	28.53	6.38	83.2859
3	614	21.79	28.4514	6.66145	101.227
3	573	22.7913	27.5685	4.77717	27.4203
3	507	23.1997	28.8798	5.68012	51.2726
3	486	24.3679	29.583	5.21504	37.1437
3	286	22.2741	28.9809	6.70676	104.457
3	275	22.7925	28.4452	5.65266	50.306
3	226	23.1677	29.5336	6.36591	82.4766
3	194	23.3574	26.2167	2.85931	7.25666
3	21	22.3906	29.4291	7.03849	131.461
3	6	23.7138	29.6898	5.97597	62.9428
7	2267	21.5493	28.3843	6.83505	114.171
7	2188	22.0018	27.2548	5.25303	38.1345
7	1921	22.8851	28.34	5.45494	43.8631
7	1870	23.69	28.1861	4.49605	22.5656
7	1690	22.58	28.28	5.7	51.9842
7	1528	23.9769	29.5704	5.59358	48.2876
7	1293	22.3413	28.21	5.86869	58.432
7	282	23.1602	27.9385	4.77831	27.4418
7	284	23.3848	28.7312	5.34645	40.6858
7	392	23.2903	29.2551	5.96474	62.4546
7	475	21.7804	28.5649	6.78457	110.245
7	492	23.0078	29.5814	6.57367	95.2512
7	512	24.3213	29.1797	4.85837	29.0079
7	540	21.2674	27.6356	6.3682	82.6075
7	554	22.1869	28.2578	6.07092	67.2247
7	670	24.1072	29.7662	5.659	50.5275
7	981	22.5071	28.423	5.91584	60.3735
7	979	21.8202	28.9003	7.08012	135.31
7	1050	23.4987	29.0925	5.59376	48.2936
7	1118	22.1563	28.6913	6.53497	92.7301
7	2128	21.96	28.2969	6.33692	80.8356
7	2283	22.8817	28.243	5.36132	41.1071
7	1972	22.5338	28.132	5.59825	48.4441
7	1521	23.1488	29.0837	5.93487	61.1751
7	1371	22.2477	28.3638	6.1161	69.3633
7	948	20.947	28.5063	7.55925	188.609
7	382	21.8174	28.4149	6.59746	96.8355
7	221	21.553	28.1192	6.56623	94.7617
11	2182	23.7516	28.3812	4.62961	24.7543
11	2147	23.304	27.0795	3.77545	13.6938
11	1817	22.5653	28.3234	5.75812	54.1211
11	1527	23.3782	29.6507	6.27247	77.304
11	1525	23.6622	28.4675	4.80532	27.9606
11	1319	22.5987	27.2617	4.66299	25.3337
11	1382	22.2225	28.8616	6.63907	99.669
11	938	24.9449	32.2072	7.26239	153.532
11	929	22.4884	28.1106	5.62217	49.2541
11	728	22.7989	27.1446	4.3457	20.3323
11	604	22.433	27.821	5.38801	41.8748
11	586	22.236	29.8267	7.5907	192.765
11	158	23.1808	28.3073	5.12644	34.9312
6	2203	23.0763	27.7708	4.69444	25.8921
6	2290	23.2665	28.7565	5.48996	44.941
6	1869	23.1984	29.2622	6.06374	66.8911
6	1783	22.564	28.7403	6.17633	72.3202
6	2301	23.1176	27.7748	4.65719	25.2321
6	1588	22.4589	28.3437	5.88477	59.0872
6	700	24.3294	30.225	5.89558	59.5315
6	537	22.385	27.9759	5.59095	48.1995
6	527	22.9223	28.4346	5.51224	45.6405
6	347	22.4679	28.7959	6.3279	80.3319
12	2235	21.905	27.2011	5.29613	39.2911
12	1522	21.3497	28.2603	6.91058	120.308
12	1372	22.6457	28.7966	6.1509	71.0568
12	1352	21.3878	28.1584	6.77061	109.184
12	1117	22.8291	28.0988	5.26974	38.5789
12	1038	22.9506	29.0532	6.10264	68.7191
12	239	23.228	30.0598	6.83173	113.909
12	203	23.6141	28.8844	5.27028	38.5934
12	166	22.7036	28.2609	5.55732	47.0891
8	2039	23.0516	28.2249	5.17322	36.0822
8	2284	23.2064	30.0588	6.85238	115.55
8	1871	22.7911	27.9863	5.19515	36.635
8	1708	21.7241	29.8415	8.11741	277.704
8	969	23.158	28.5752	5.41722	42.7311
8	711	22.5097	27.9372	5.42746	43.0358
8	510	21.8389	27.8871	6.04822	66.1752
5	2214	23.4739	29.4635	5.98969	63.5442
5	2207	23.7462	30.3694	6.62318	98.5768
5	2037	22.4531	29.8767	7.42367	171.691
5	1804	22.3316	27.2431	4.91141	30.094
5	1311	23.6062	30.93	7.32384	160.212
5	944	22.1793	28.7026	6.52323	91.9791
9	1958	22.2462	27.0771	4.83093	28.4614
9	1827	22.6316	28.6247	5.99303	63.6917
9	1589	22.3333	28.1169	5.78358	55.0849
9	1359	22.3328	27.8659	5.53313	46.3061
9	561	22.3726	27.5684	5.1958	36.6514
9	357	23.3918	29.1896	5.79772	55.6274
17	1811	22.4384	27.3653	4.92694	30.4199
17	1806	21.7547	27.1376	5.38289	41.7265
17	1782	23.465	30.9037	7.43867	173.486
17	1356	22.851	27.1654	4.31435	19.8953
17	941	22.3417	29.675	7.33321	161.257
